# Supplementary material
Source: PubMed Central journal article supplement (PMC7399542)
Supplement: mmc1.pdf [file mmc1.pdf]

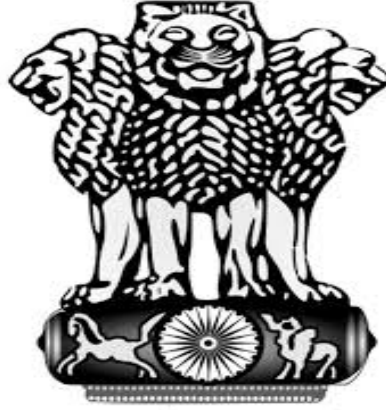

सत्यमेव जयते

## **REPORT OF COVID-19 CASES**

**Date: 6 April 2020**

**Time: 10:00 AM**

**Medical Education and Drugs Department  
Government of Maharashtra**

**Source Of Data: Public Health Department**

**Report Prepared by:**

**Chief Editor:**

**Dr. Sanjay Mukherjee, IAS Secretary Medical Education & Drugs Department**

**Co-Editors:** Dr. Rakesh Waghmare & Dr. Joshua Selwyn

**Table 1: Comparison of Cases and Death**

| <b>VARIABLES</b>   | <b>WORLD</b> | <b>INDIA</b> | <b>MAHARASHTRA</b> |
|--------------------|--------------|--------------|--------------------|
| <b>TOTAL CASE</b>  | 1133758      | 4125         | 748                |
| <b>NEW CASE</b>    | 82061        | 603          | 110                |
| <b>TOTAL DEATH</b> | 62784        | 109          | 45                 |
| <b>NEW DEATH</b>   | 5798         | 24           | 13                 |
| <b>MORTALITY</b>   | 5.53%        | 2.64         | 6.01%              |

**Figure No. 1: Trends of Daily Cases in India**

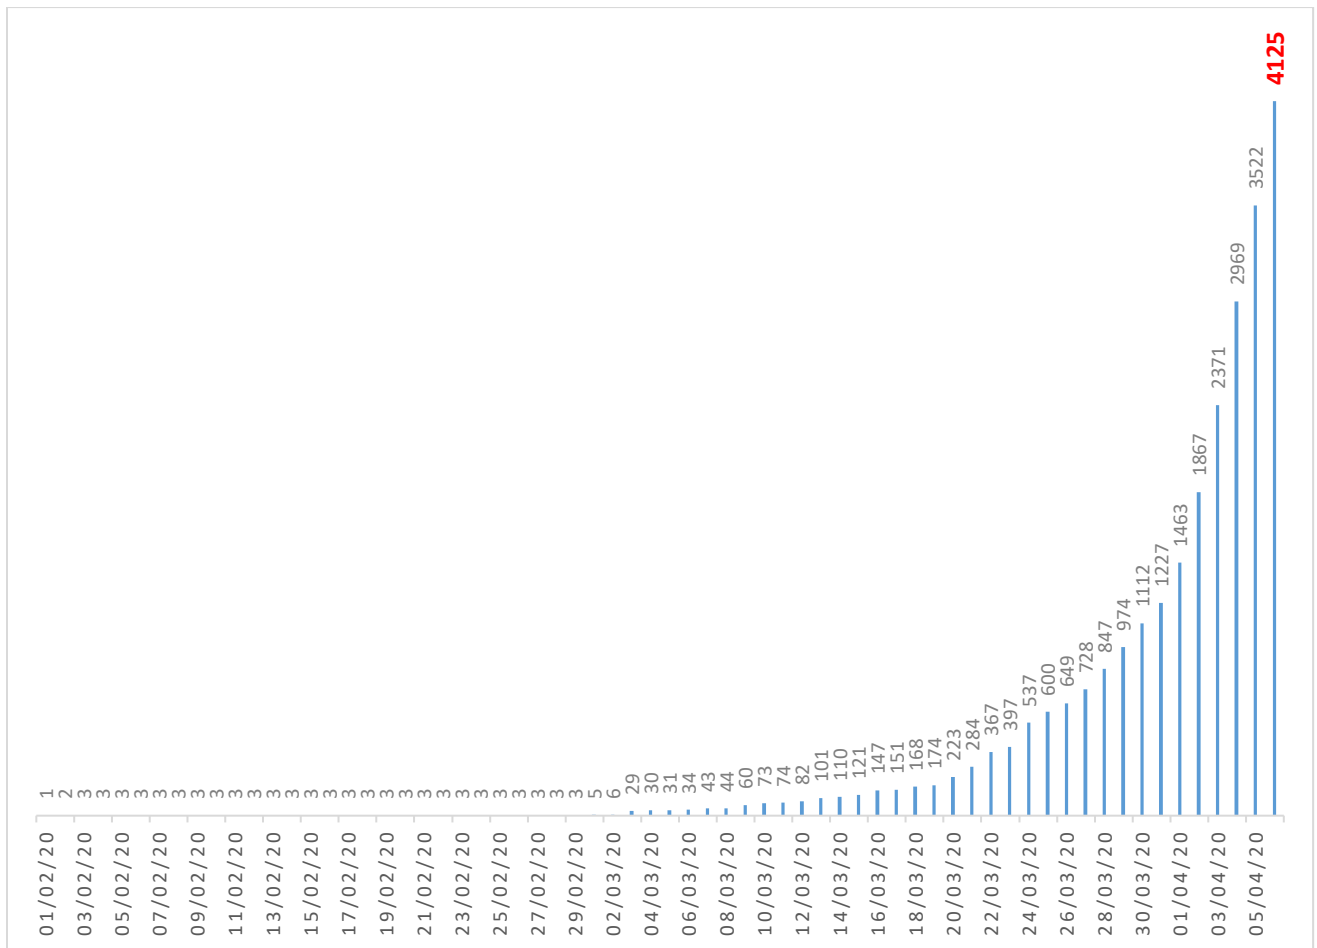

**Table No. 2: Statewise Diatribution of Cases & Deaths**

| <b>Sr No</b> | <b>Name of State</b>      | <b>Cases</b> | <b>Deaths</b> | <b>Mortality</b> |
|--------------|---------------------------|--------------|---------------|------------------|
| 1            | Maharashtra               | 748          | 45            | 6.52             |
| 2            | Kerala                    | 314          | 2             | 0.63             |
| 3            | Uttar Pradesh             | 227          | 2             | 0.88             |
| 4            | Delhi                     | 503          | 7             | 1.39             |
| 5            | Karnataka                 | 151          | 4             | 2.64             |
| 6            | Union Territory of Ladakh | 14           | 0             | 0                |
| 7            | Rajasthan                 | 253          | 0             | 0                |
| 8            | Telangana                 | 321          | 7             | 2.18             |
| 9            | Andhra Pradesh            | 226          | 3             | 1.32             |
| 10           | Haryana                   | 84           | 1             | 1.19             |
| 11           | UT of J & K               | 106          | 2             | 1.88             |
| 12           | UT of Chandigarh          | 18           | 0             | 0                |
| 13           | Punjab                    | 68           | 6             | 8.82             |
| 14           | Odisha                    | 21           | 0             | 0                |
| 15           | Tamil Nadu                | 571          | 5             | 0.87             |
| 16           | Uttarakhand               | 26           | 0             | 0                |
| 17           | Puducherry                | 5            | 0             | 0                |
| 18           | West Bengal               | 80           | 3             | 3.75             |
| 19           | Chattisgarh               | 9            | 0             | 0                |
| 20           | Gujarat                   | 122          | 11            | 9.02             |
| 21           | Himachal Pradesh          | 13           | 1             | 7.69             |
| 22           | Madhya Pradesh            | 165          | 9             | 5.45             |
| 23           | Bihar                     | 30           | 1             | 3.33             |
| 24           | Manipur                   | 2            | 0             | 0                |
| 25           | Mizoram                   | 1            | 0             | 0                |
| 26           | Goa                       | 7            | 0             | 0                |
| 27           | Andaman and Nicobar       | 10           | 0             | 0                |
| 28           | Assam                     | 26           | 0             | 0                |
| 29           | Jharkhand                 | 3            | 0             | 0                |
| 30           | Arunachal Pradesh         | 1            | 0             | 0                |
|              | <b>TOTAL</b>              | <b>4125</b>  | <b>109</b>    | <b>2.64</b>      |

**Figure 2: Statewise Distribution of Cases**

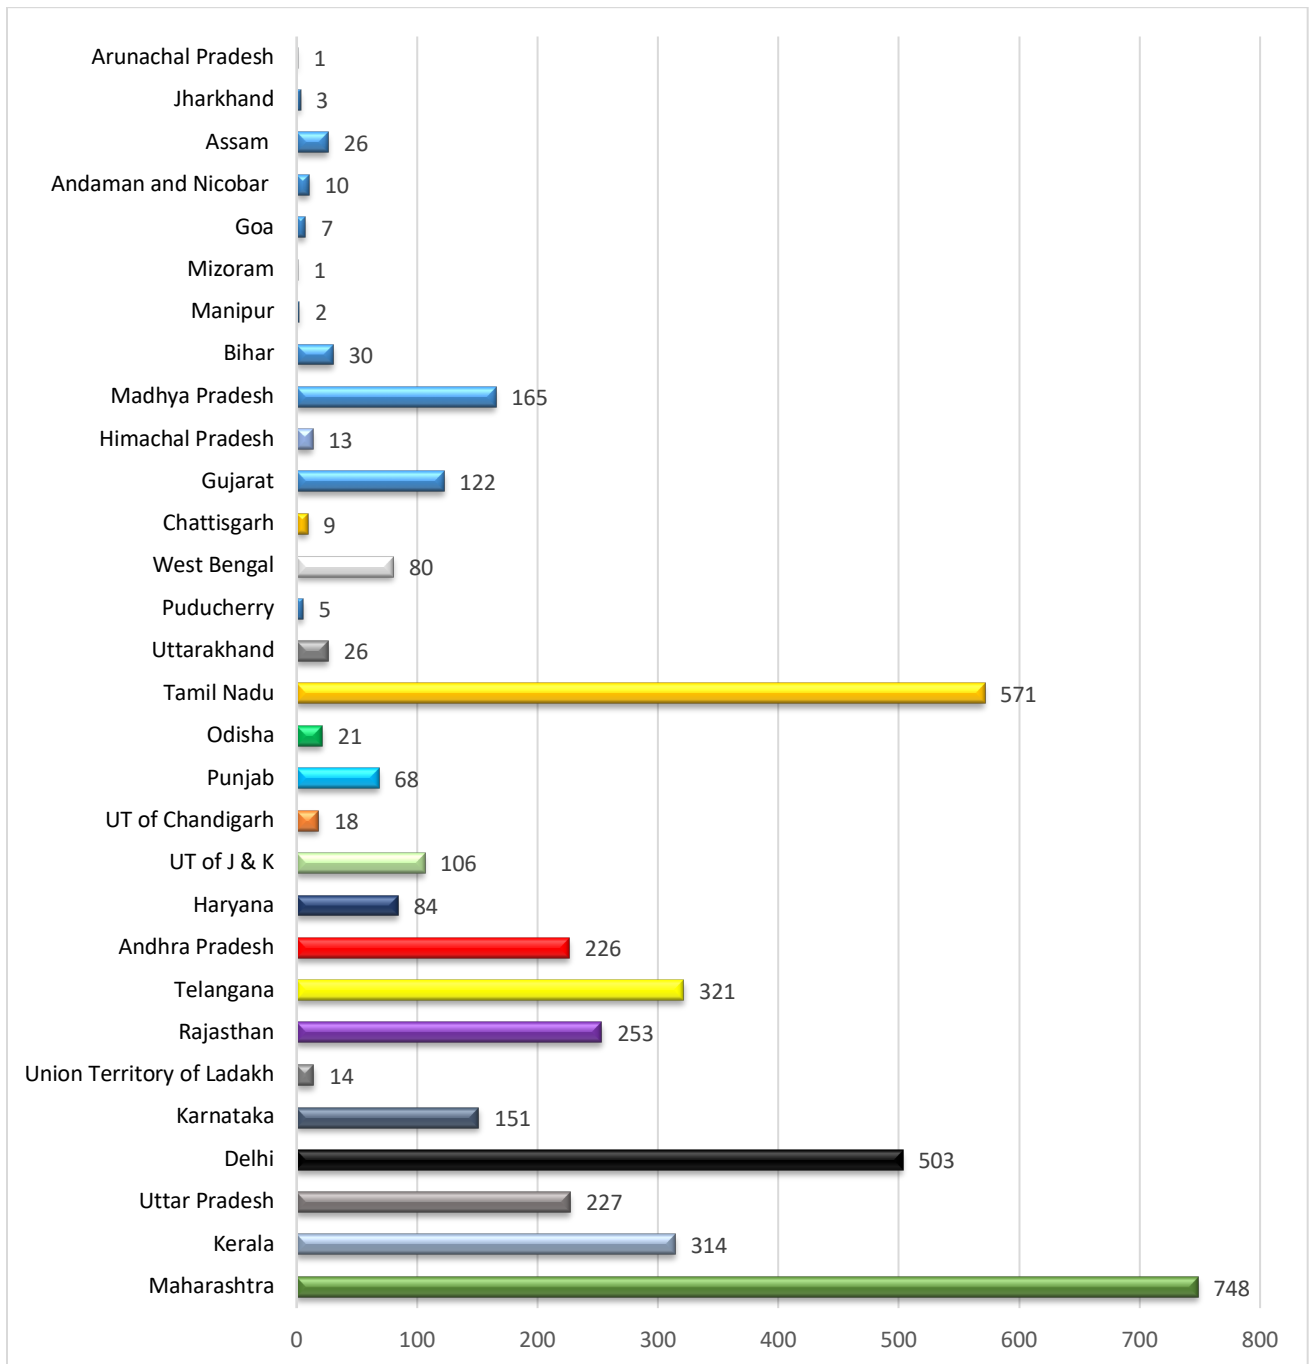

**Figure 3: Date wise trend of Cases in India & Maharashtra**

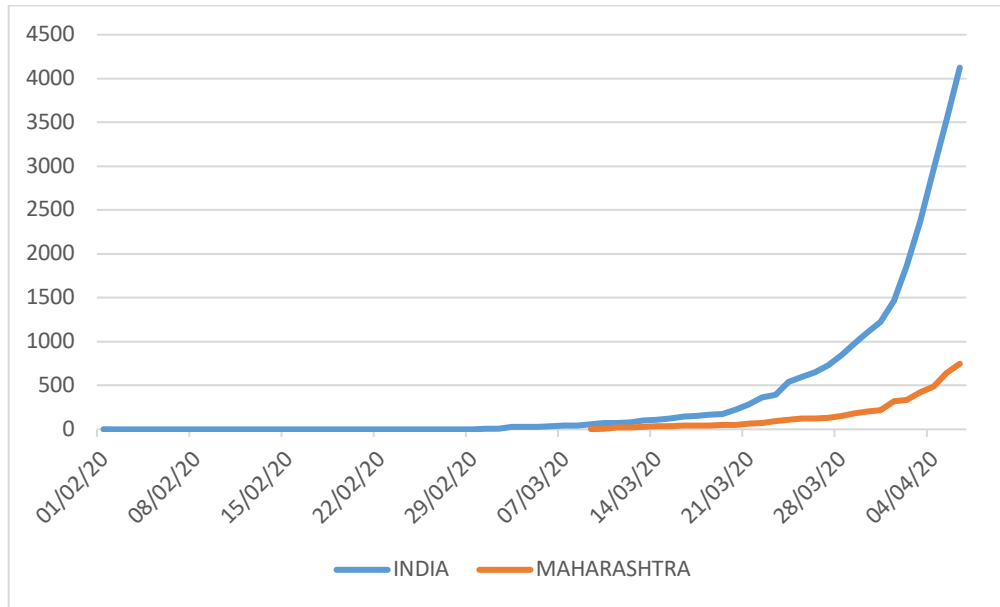

**Figure 4: Day wise trend of Cases India & Maharashtra**

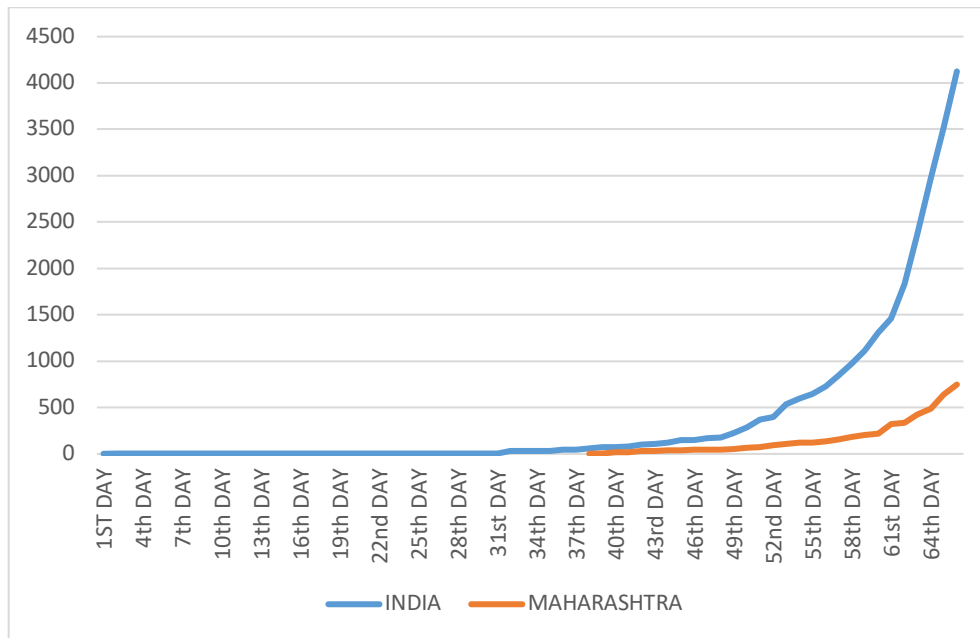

**Figure 5: Datewise Distribution of Cases in Maharashtra (N= 748)**

**a) Datewise New cases**

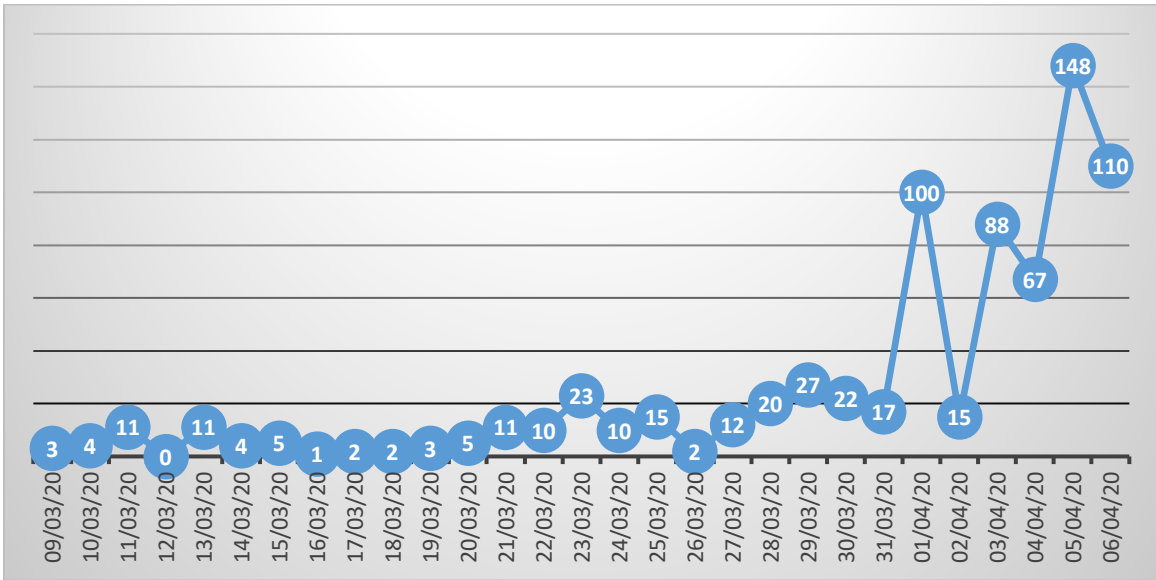

**b) Datewise Cumulative cases**

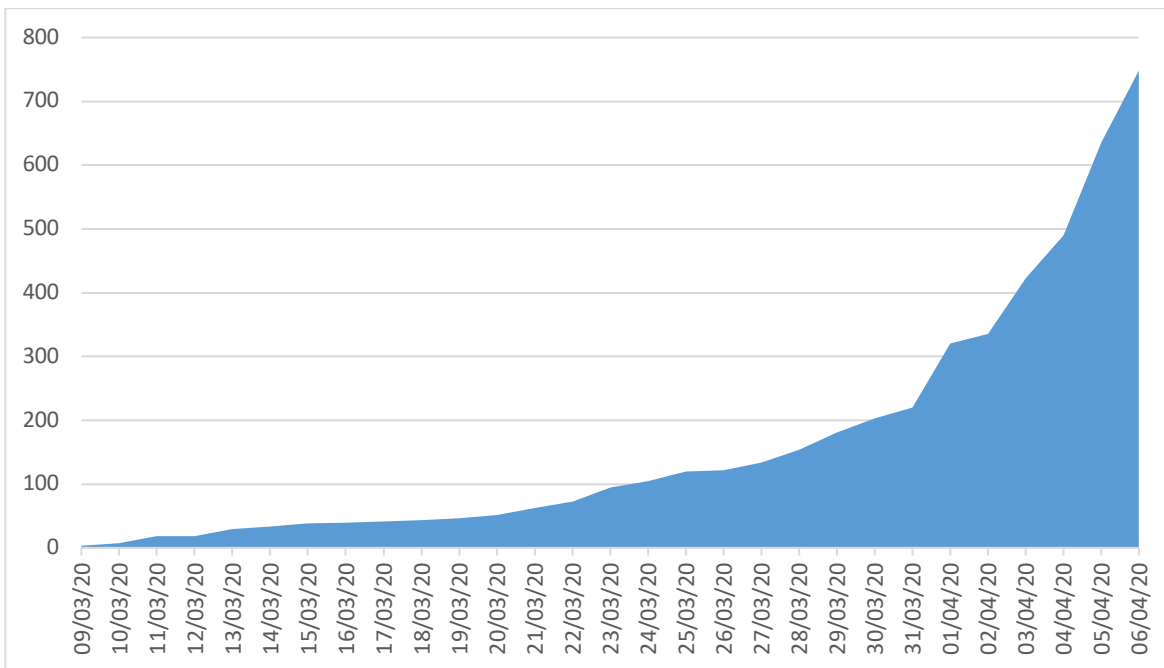

**Figure 6: Daywise Distribution of Cases (N= 748)**

**a) Daywise Cumulative cases**

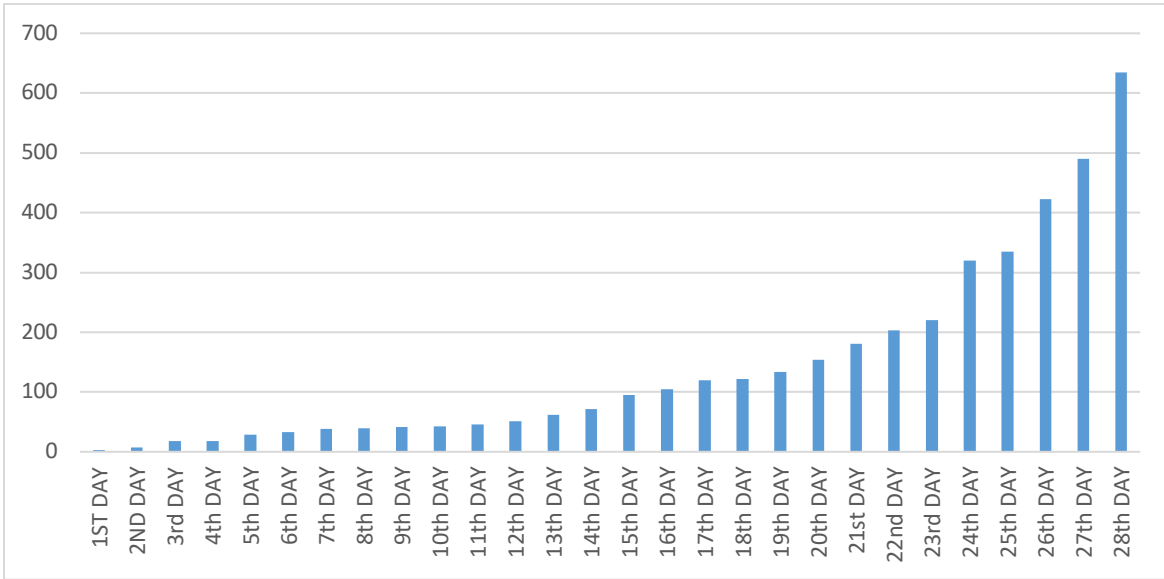

**b) Daywise Distribution of New cases**

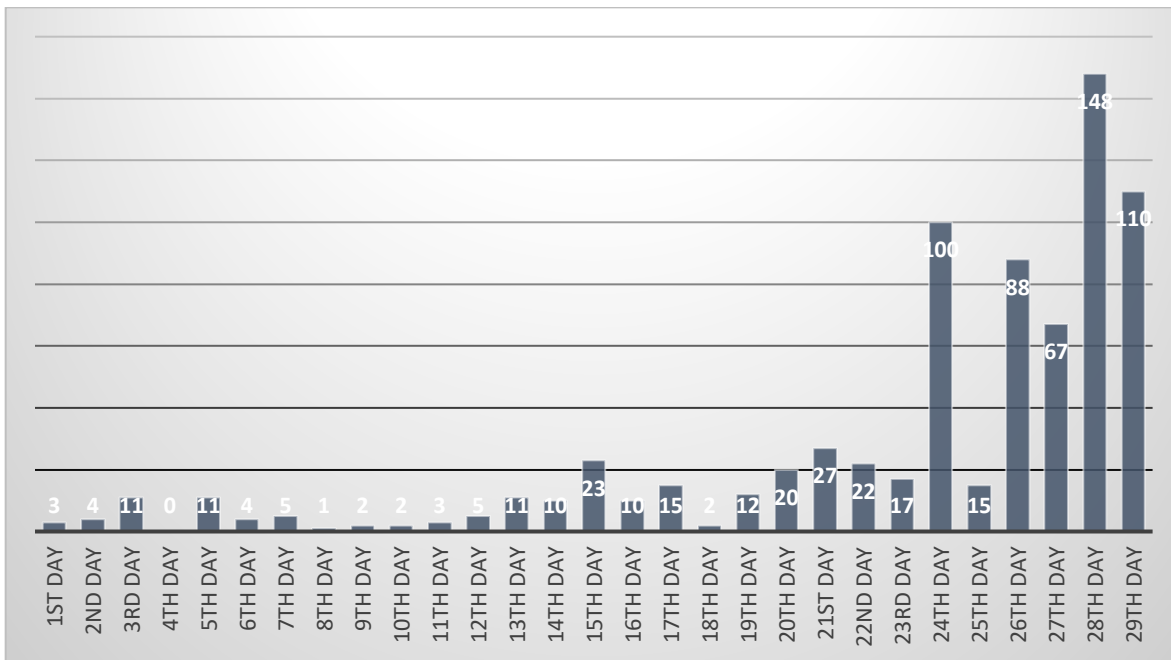

**Figure 7: Date wise Distribution of Death in India (N=109) and Maharashtra (N=45)**

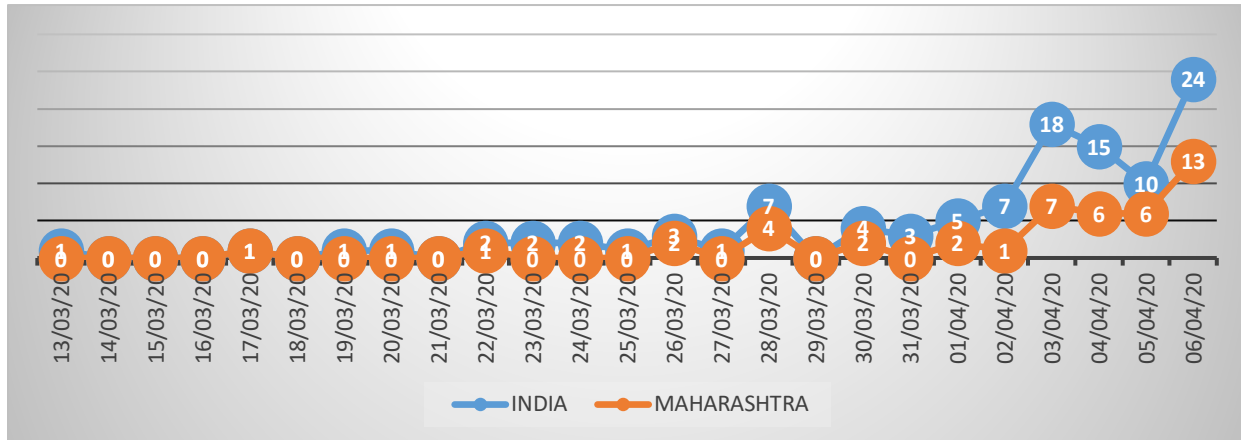

**Table 3 :Districtwise Total and New cases(N= 748)**

| DISTRICTS                                                   | TOTAL CASE | NEW CASE   | TOTAL DEATHS | NEW DEATHS |
|-------------------------------------------------------------|------------|------------|--------------|------------|
| MUMBAI                                                      | 458        | 81         | 30           | 8          |
| PUNE                                                        | 100        | 18         | 5            | 3          |
| SANGLI                                                      | 25         | 0          | 0            | 0          |
| AHMEDNAGR                                                   | 21         | 1          | 0            | 0          |
| NAGPUR                                                      | 17         | 0          | 0            | 0          |
| LATUR                                                       | 8          | 0          | 0            | 0          |
| BULDHANA                                                    | 5          | 0          | 1            | 0          |
| YAVATMAL                                                    | 4          | 0          | 0            | 0          |
| MUNICIPAL CORPORATIONS IN THANE DIVISION(OTHER THAN MUMBAI) | 82         | 5          | 6            | 1          |
| SATARA                                                      | 3          | 0          | 0            | 0          |
| AURANGABAD                                                  | 7          | 4          | 1            | 1          |
| OSMANABAD                                                   | 4          | 1          | 0            | 0          |
| KOLHAPUR                                                    | 2          | 0          | 0            | 0          |
| RATNAGIRI                                                   | 2          | 0          | 0            | 0          |
| JALGAON                                                     | 2          | 0          | 1            | 0          |
| SINDHUDURG                                                  | 1          | 0          | 0            | 0          |
| GONDIA                                                      | 1          | 0          | 0            | 0          |
| NASHIK                                                      | 1          | 0          | 0            | 0          |
| WASHIM                                                      | 1          | 0          | 0            | 0          |
| AMRAVATI                                                    | 1          | 0          | 1            | 0          |
| HINGOLI                                                     | 1          | 0          | 0            | 0          |
| OTHER STATES                                                | 2          | 0          | 0            | 0          |
| <b>TOTAL</b>                                                | <b>748</b> | <b>110</b> | <b>45</b>    | <b>13</b>  |



**Figure 8: Districtwise Distribution of Cases in Maharashtra (N= 748)**

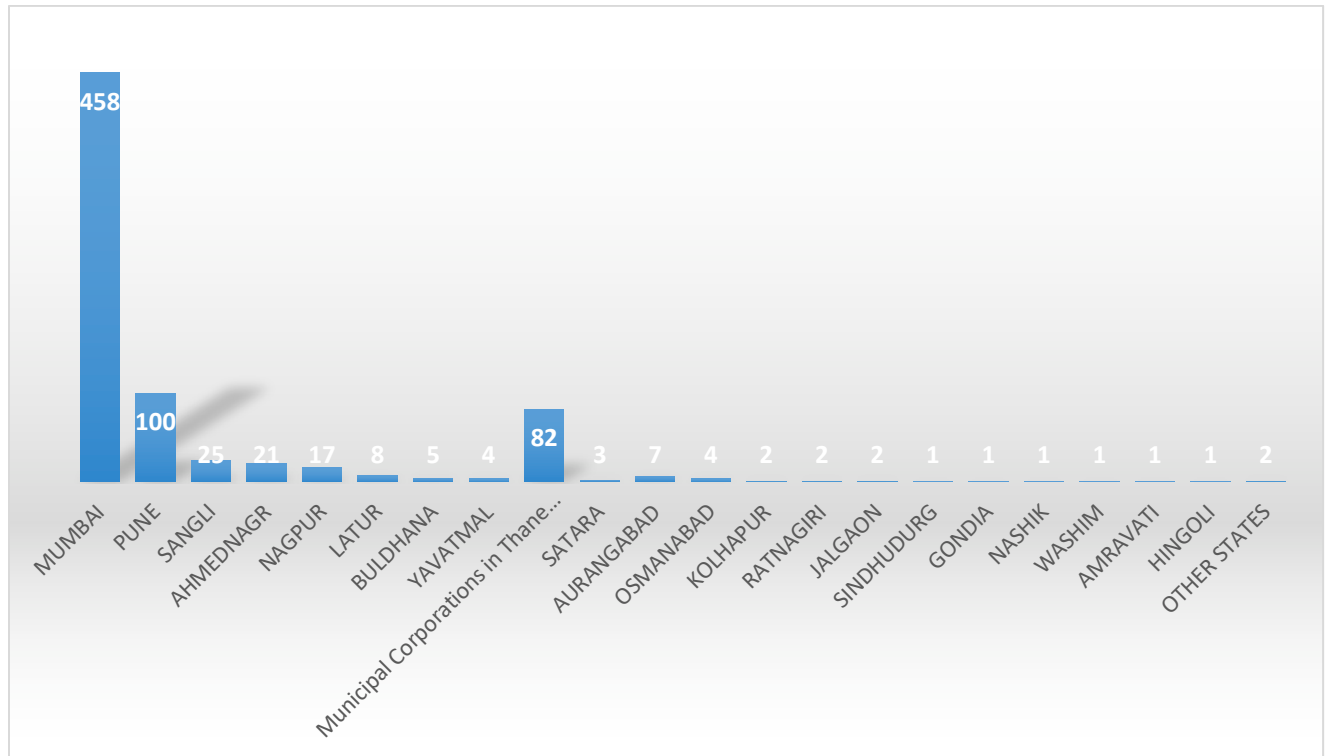

**Table. 4: Age wise distribution of cases and deaths (N=31)\***

| S.NO | AGE GROUP  | NO.OF PATIENTS | NO.OF DEATHS | MORTALITY % |
|------|------------|----------------|--------------|-------------|
| 1    | 1-10 Yrs.  | 15             | 0            | 0           |
| 2    | 11-20 yrs. | 45             | 0            | 0           |
| 3    | 21-30 yrs. | 123            | 0            | 0           |
| 4    | 31-40 yrs. | 128            | 1            | 0.98        |
| 5    | 41-50 yrs. | 133            | 5            | 3.66        |
| 6    | 51-60 yrs. | 88             | 5            | 6.66        |
| 7    | 61-70 yrs. | 73             | 14           | 20.68       |
| 8    | 71-80 YRS  | 21             | 4            | 21.42       |
| 9    | 81-90 YRS  | 9              | 2            | 50          |

**Figure 9: Age wise distribution of Maharashtra Cases (N = 635)\***

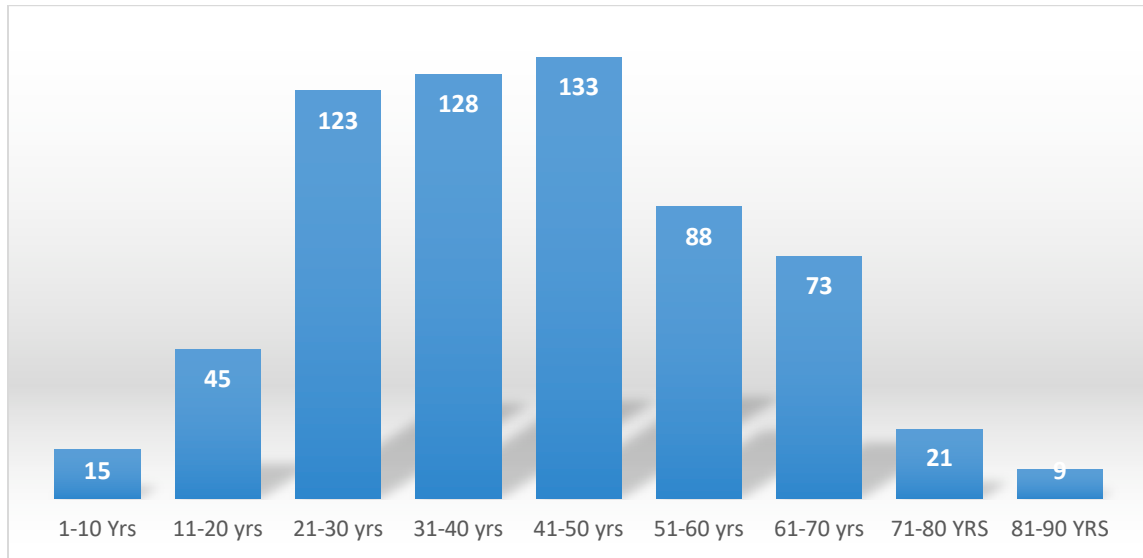

**Figure 10: Age wise distribution of death in Maharashtra (N=31)\***

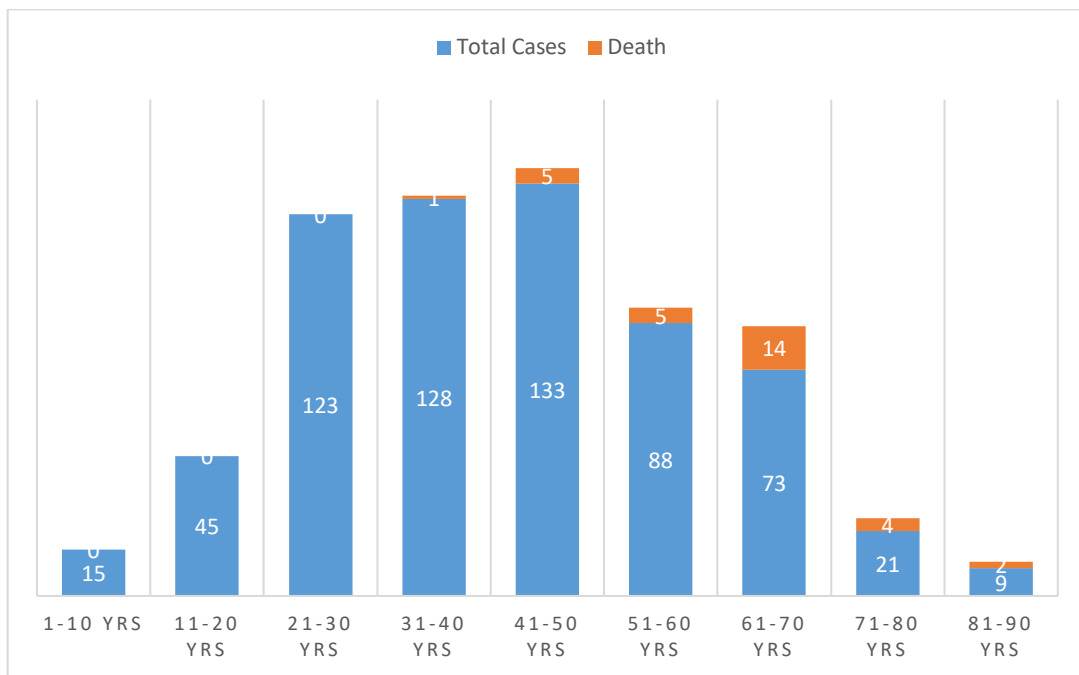

**Figure 11: Sex wise distribution of Cases (N= 635) \***

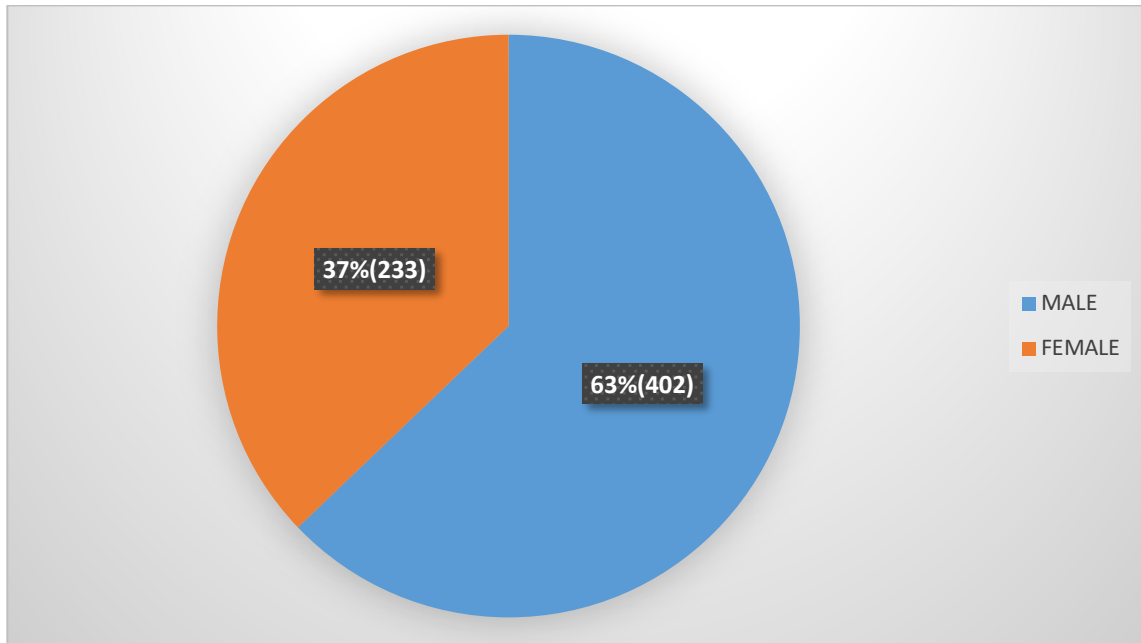

**Table 5: Sexwise distribution of Deaths (N= 635) \***

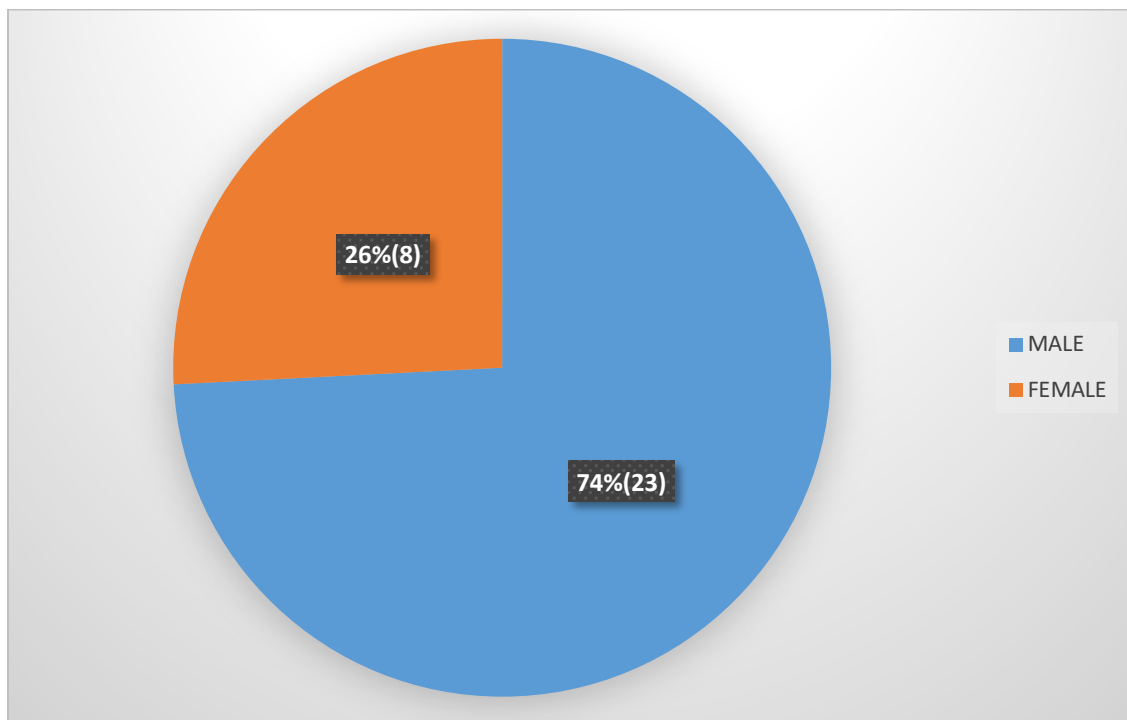

**Figure 12: Travellers Vs Contact (N= 635) \***

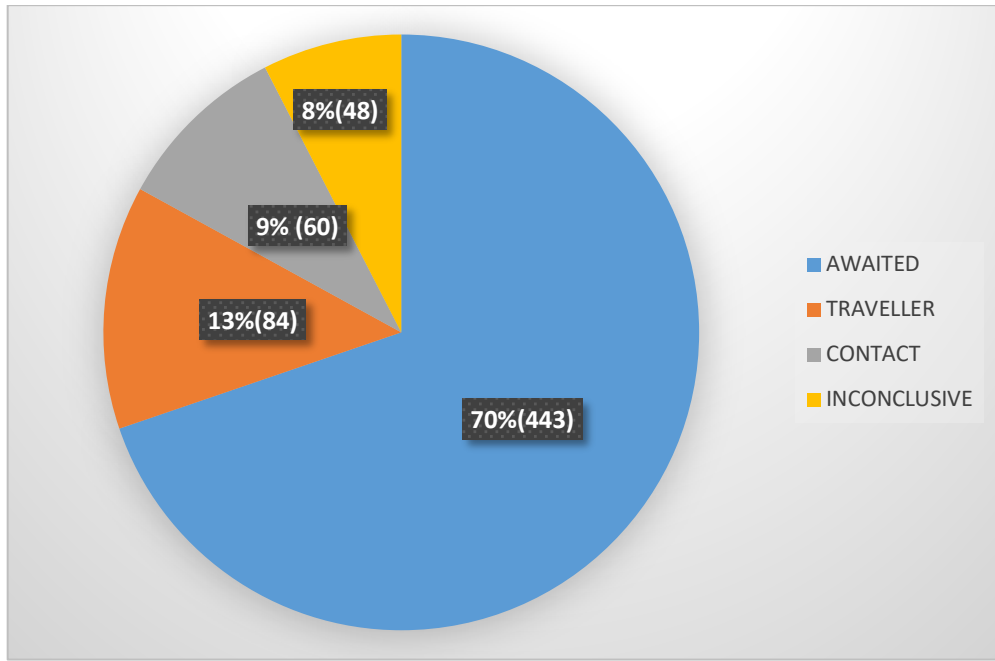

**Figure 13: Travllers Details (N= 84) \***

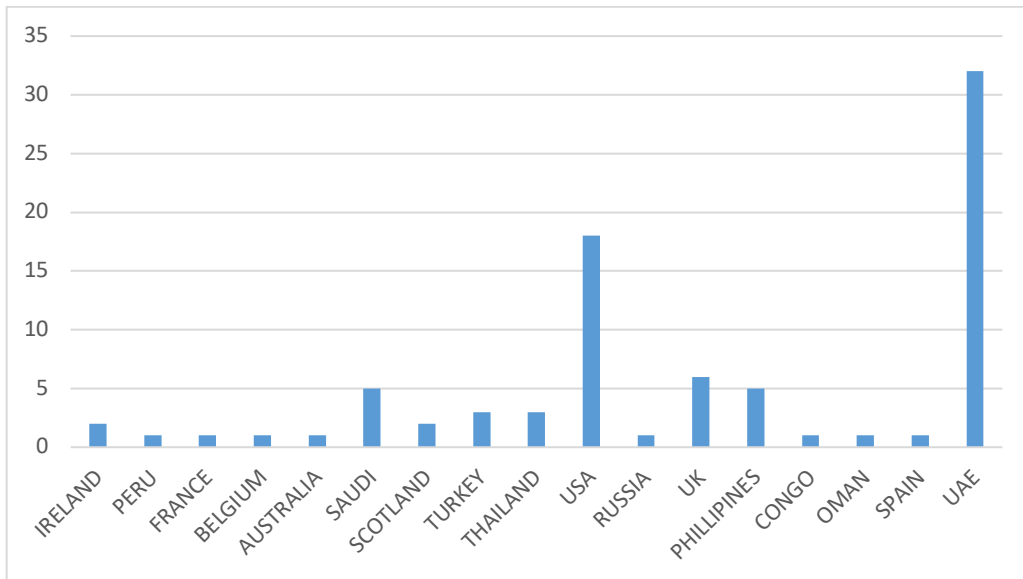

**Figure 14: Total samples tested in Maharashtra(N=15472)\***

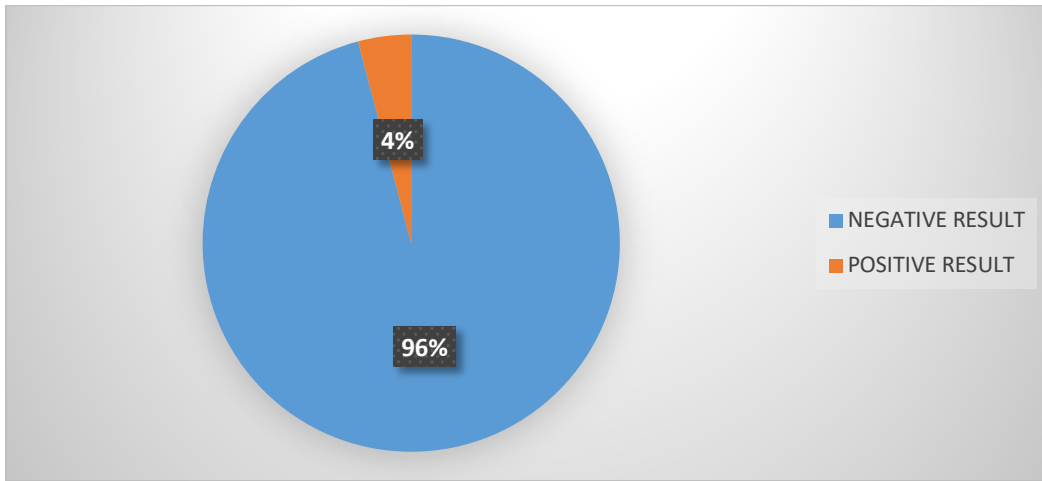

**Table 6: COVID-19 Testing status, Maharashtra.\***

| STATUS   | GOVERNMENT LABS | PRIVATE LABS | TOTAL |
|----------|-----------------|--------------|-------|
| TESTED   | 10893           | 5115         | 16008 |
| NEGATIVE | 9824            | 5013         | 14837 |
| POSITIVE | 533             | 102          | 635   |
| AWAITED  | 532             | 0            | 532   |

**Figure 15: Status of COVID-19 Cases(N=635)\***

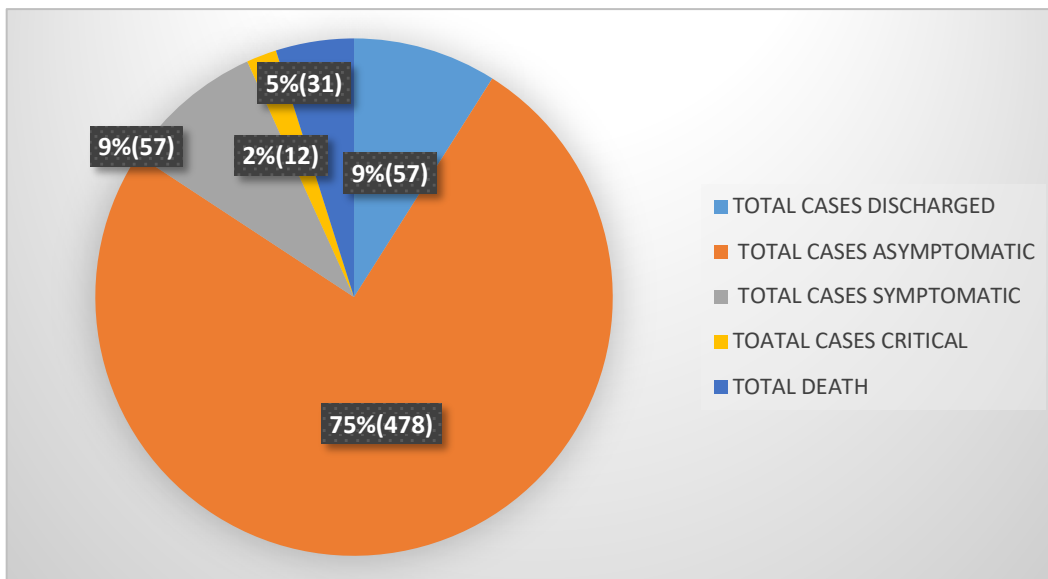

**Figure 16: Date wise distribution of new cases (Travellers vs Non travellers)\***

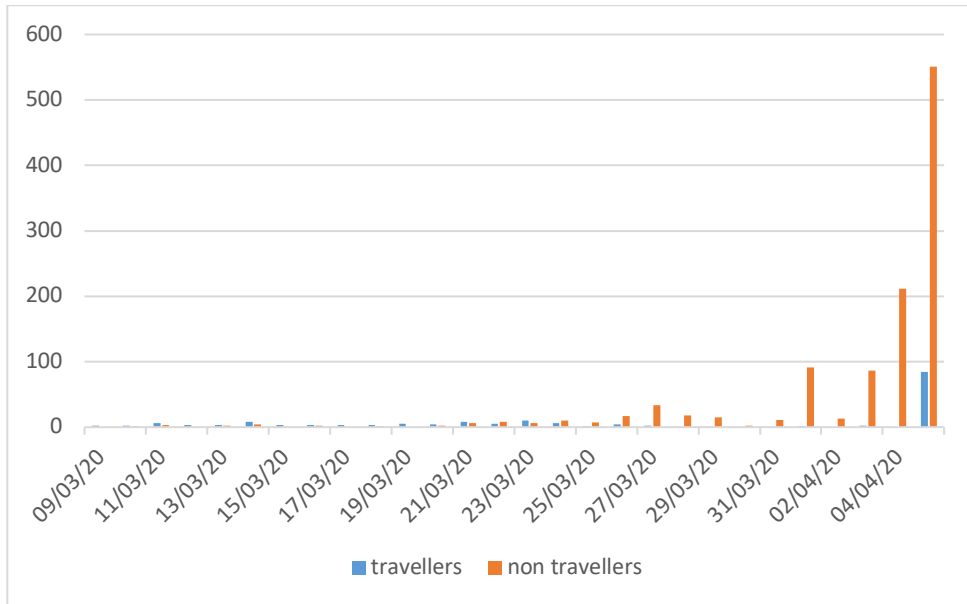

**Figure 17: Day wise cumulative distribution of cases (Travellers vs Non travellers)\***

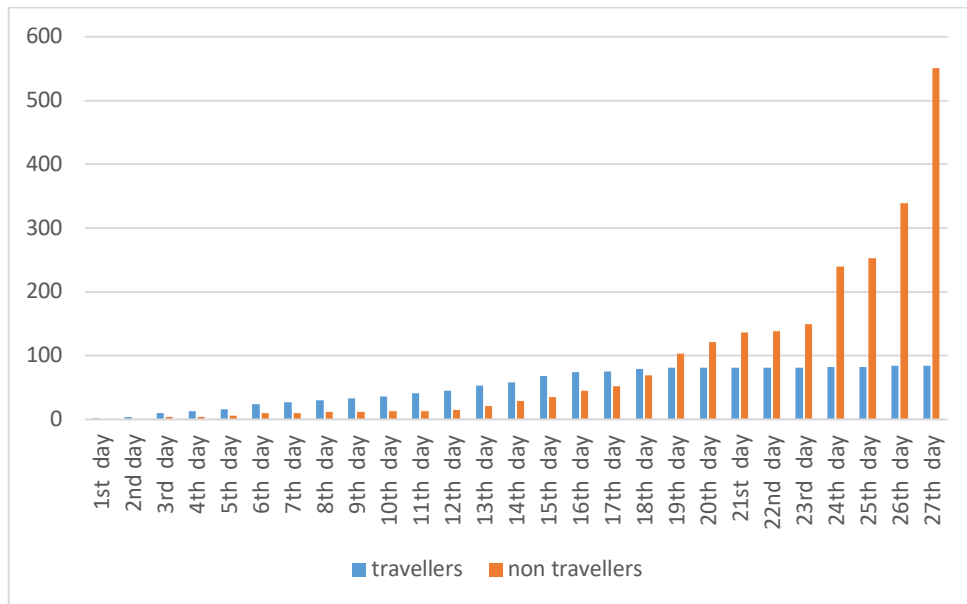

**Table 7: Comparison of weekly cases with other countries**

| WEEKS                 | INDIA | USA    | FRANCE | ITALY  | JAPAN | IRAN  | SPAIN  | CHINA |
|-----------------------|-------|--------|--------|--------|-------|-------|--------|-------|
| 1ST WEEK              | 3     | 11     | 6      | 3      | 4     | 95    | 2      | 278   |
| 2 <sup>ND</sup> WEEK  | 3     | 13     | 6      | 3      | 20    | 2336  | 2      | 2761  |
| 3rd WEEK              | 3     | 15     | 11     | 400    | 26    | 8042  | 2      | 17238 |
| 4th WEEK              | 3     | 53     | 12     | 3089   | 59    | 16169 | 45     | 40235 |
| 5th WEEK              | 34    | 108    | 38     | 12462  | 144   | 24811 | 589    | 70635 |
| 6th WEEK              | 101   | 696    | 420    | 31506  | 254   | 35408 | 7753   | 77262 |
| 7th WEEK              | 223   | 3536   | 2860   | 74386  | 488   | 55743 | 28572  | 80174 |
| 8th WEEK              | 724   | 51914  | 9043   | 92472  | 814   |       | 72248  | 80904 |
| 9th WEEK              | 1112  | 103321 | 28786  | 124632 | 1089  |       | 124736 | 81077 |
| 10thWEEK              | 4125  | 122653 | 37145  |        | 1693  |       |        | 81601 |
| 11 <sup>th</sup> WEEK |       | 273808 | 67757  |        | 3271  |       |        | 82351 |
| 12 <sup>TH</sup> WEEK |       |        |        |        |       |       |        | 82930 |

**Table 8: Doubling time comparison with other countries**

| No. of cases | CHINA    | KOREA    | INDIA    | USA      | FRANCE   | ITALY    | JAPAN    | SPAIN    | IRAN     |
|--------------|----------|----------|----------|----------|----------|----------|----------|----------|----------|
| 100          | 1ST DAY  | 31ST DAY | 42ND DAY | 44TH DAY | 41ST DAY | 25TH DAY | 33RD DAY | 43RD DAY | 8TH DAY  |
| 1000         | 5 DAYS   | 37TH DAY | 58TH DAY | 53RD DAY | 49TH DAY | 31ST DAY | 63RD DAY | 50TH DAY | 13TH DAY |
| 2000         | 6TH DAY  | 39TH DAY | 63RD DAY | 56TH DAY | 52ND DAY | 33RD DAY |          | 52ND DAY | 14TH DAY |
| 4000         | 8TH DAY  | 42ND DAY | 66TH DAY | 60ST DAY | 55TH DAY | 37TH DAY |          | 54TH DAY | 17TH DAY |
| 8000         | 11TH DAY | 54TH DAY |          | 61ST DAY | 60TH DAY | 40TH DAY |          | 57TH DAY | 21ST DAY |
| 16000        | 14TH DAY |          |          | 62nd DAY | 64TH DAY | 44TH DAY |          | 61ST DAY | 28TH DAY |
| 32000        | 19TH DAY |          |          | 64TH DAY | 68TH DAY | 50TH DAY |          | 64TH DAY | 38TH DAY |
| 64000        | 28TH DAY |          |          | 67TH DAY | 73RD DAY | 55TH DAY |          | 68TH DAY |          |
| 128000       |          |          |          | 71ST DAY |          |          |          |          |          |
| 256000       |          |          |          | 73RDDAY  |          |          |          |          |          |

\*Figure 9,10,11,12,13,14,15, 16 ,17 & Table:4,5,6 showing the Age, Sex, Contact History,Agewise death are available for 635 cases.

Source:Report is prepared on the basis of information published by WHO, MOHFW and Public Health Department.

Data Collection timing: 9:00 AM – 9:00 AM
